# Supplementary material for: Dynamics of Volatile Compounds in Triticale Bread with Sourdough: From Flour to Bread
Source: MDPI journal article supplement (doi:10.3390/foods9121837), 2020-12-10
Supplement: s1 [file s1]

Table S1. Relative area of volatile compounds in flours and flour blend (%)

| Volatile compound        | Triticale*     | Rye*           | Hull-less barley* | Rice           | Maize          | Flour blend    |
|--------------------------|----------------|----------------|-------------------|----------------|----------------|----------------|
| Decanoic acid ethylester | 1.65 ± 0.07 c  | 1.59 ± 0.07 c  | 5.34 ± 0.04 a     | 1.84 ± 0.06 c  | 1.56 ± 0.06 c  | 2.48 ± 0.18 b  |
| Hexanal                  | 5.43 ± 0.04 d  | 26.29 ± 0.72 a | 8.97 ± 0.30 c     | 29.95 ± 0.63 a | 11.50 ± 0.32 b | 7.35 ± 0.22 c  |
| Hexanoic acid            | 0.67 ± 0.02 e  | 8.04 ± 0.27 a  | 5.60 ± 0.30 b     | 4.11 ± 0.32 c  | 1.42 ± 0.03 d  | 1.29 ± 0.06 d  |
| 1-Hexanol                | 22.34 ± 0.76 a | 14.34 ± 0.32 b | 13.21 ± 0.50 bc   | 12.17 ± 0.37 c | 5.27 ± 0.29 d  | 22.57 ± 0.37 a |
| N-decanoic acid          | 2.96 ± 0.16 c  | 2.97 ± 0.20 c  | 13.64 ± 0.89 a    | 2.98 ± 0.17 c  | 2.25 ± 0.03 d  | 4.27 ± 0.11 b  |
| Nonanoic acid            | 0.84 ± 0.02 c  | 0.98 ± 0.02 bc | 2.42 ± 0.08 a     | 1.12 ± 0.05 b  | 0.93 ± 0.02 bc | 0.87 ± 0.03 c  |
| Octanoic acid            | 1.27 ± 0.03 d  | 1.57 ± 0.08 c  | 3.95 ± 0.34 a     | 2.41 ± 0.05 b  | 1.50 ± 0.04 c  | 1.83 ± 0.12 c  |
| 1-Octen-3-ol             | 2.13 ± 0.26 de | 2.42 ± 0.22 d  | 3.39 ± 0.04 c     | 5.48 ± 0.20 a  | 1.61 ± 0.02 e  | 4.36 ± 0.10 b  |
| 1-Pentanol               | 2.44 ± 0.31 b  | 2.40 ± 0.13 b  | 2.23 ± 0.03 b     | 3.64 ± 0.07 a  | 1.03 ± 0.05 c  | 3.00 ± 0.16 a  |
| Other                    | 60.27 ± 1.67 b | 39.39 ± 1.82 d | 41.25 ± 2.52 d    | 36.30 ± 1.93 e | 72.93 ± 0.86 a | 51.97 ± 1.35 c |

\* whole grain flour. All data are means ± standard deviation (n = 3). a, b, c ... : values with the different lowercase letters in the same row are significantly different, based on Tukey's test.

Table S2. Relative area of volatile compounds in mixed dough

| Volatile compounds     | FB-MD          | TKS-MD         | SF-MD          |
|------------------------|----------------|----------------|----------------|
| Acetic acid            | 2.02 ± 0.14 b  | 2.03 ± 0.03 b  | 4.47 ± 0.15 a  |
| Carvone                | 4.57 ± 0.21    | n.d.           | n.d.           |
| Cyclobutanol           | n.d.           | 0.68 ± 0.04    | n.d.           |
| D-limonene             | 1.70 ± 0.08    | n.d.           | n.d.           |
| Ethanol                | 62.62 ± 0.48 a | 66.63 ± 3.24 a | 44.88 ± 0.10 b |
| Ethylacetate           | n.d.           | 24.36 ± 1.50 b | 42.73 ± 0.09 a |
| Heptanol               | 0.44 ± 0.10    | n.d.           | n.d.           |
| Hexanal                | 3.85 ± 0.01 a  | 0.64 ± 0.02 b  | 0.59 ± 0.01 b  |
| 1-Hexanol              | 10.70 ± 0.15   | n.d.           | 1.79 ± 0.03    |
| 3-Methyl-1-butanol     | 9.78 ± 0.16 a  | 1.74 ± 0.03 c  | 1.95 ± 0.01 b  |
| 4-Methyl-1-pentene     | n.d.           | 2.62 ± 0.12    | n.d.           |
| 2-Methylpropanoic acid | 1.11 ± 0.05    | 0.65 ± 0.1 b   | 0.89 ± 0.08 a  |
| 2-Methyl-1-propanol    | 1.17 ± 0.25 a  | 0.20 ± 0.07 b  | n.d.           |
| (E)-3-Nonen-1-ol       | 0.98 ± 0.06    | n.d.           | n.d.           |
| 1-Octen-3-ol           | 0.85 ± 0.14    | n.d.           | n.d.           |
| Pentanoic acid         | n.d.           | 0.17 ± 0.01    | n.d.           |
| 1-Pentanol             | n.d.           | 0.28 ± 0.01    | n.d.           |
| 1-Penten-3-ol          | 0.26 ± 0.05    | n.d.           | n.d.           |
| N-Propylacetate        | n.d.           | n.d.           | 2.70 ± 0.12    |

All data are means ± standard deviation (n = 3). FB-MD: mixed triticale flour blend bread; TKS-MD: mixed flour blend dough with two-stage sourdough; SF-MD: mixed flour blend with ready-to-use sourdough. n.d.: not detected. a, b, c: values with the different letters in the same row are significantly different, based on Tukey's or t-test.
